## SUPPLEMENTARY MATERIAL

**Fig. S1. Identification of  $\alpha$ -2,6-linked sialic acids in zebrafish embryos.** NANA- and NGNA-labeled peaks on the  $\alpha$ -2,6-linked sialic acid-specific chromatogram from zebrafish embryos reveal the presence of  $\alpha$ -2,6-linked sialic acids. This result suggests zebrafish embryos may be able to support infection by human isolates of IAV.

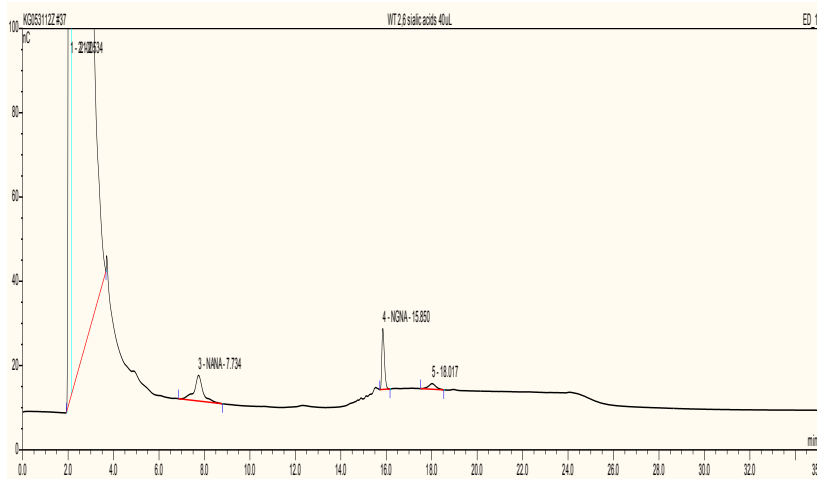

**Table S1. Sialic acids composition analysis of WT zebrafish.** The total contents of sialic acids in wild-type zebrafish embryos are shown. Both N-acetylneuraminic acid and N-glycolylneuraminic acid were detected from the sample.

| Sample ID            | Analyte | Total sialic acids content <sup>1</sup> |            |
|----------------------|---------|-----------------------------------------|------------|
|                      |         | nanomoles                               | micrograms |
| WT zebrafish embryos | NANA    | 6.4359                                  | 1.9905     |
|                      | NGNA    | 2.8461                                  | 0.9258     |

<sup>1</sup>Sample amount hydrolyzed with 2M acetic acid was ~3.6 mg.
